# Supplementary material
Source: PubMed Central journal article supplement (PMC3926078)
Supplement: 1322739111_pnas.201322739SI.pdf [file 1322739111_pnas.201322739SI.pdf]

# Supporting Information

Altin et al. 10.1073/pnas.1322739111

## SI Materials and Methods

### Sequence of Primers Used for Amplifying *Ndfip1* cDNA.

| Primer           | Sequence (5'→3')                           |
|------------------|--------------------------------------------|
| Ndfip1 sense     | TTGAATTCGCCACCATGGCCTTGGCGTTGGCG<br>GCGCTG |
| Ndfip1 antisense | AAAACCTCGAGTTAATAAATAAGAGAAGCTC<br>TGG     |

Ndfip1, neural precursor cell expressed, developmentally down-regulated protein 4 family-interacting protein 1.

### Sequence of the Primer Used for Sequencing Subcloned *Ndfip1* cDNAs in pMX-IRES-GFP Vector.

| Primer  | Sequence (5'→3')        |
|---------|-------------------------|
| pMX-5S1 | GACGGCATCGCAGCTTGATACAC |

**IgE ELISA.** Plates were coated overnight with 1 µg/mL anti-IgE capture antibody (clone R35-72; BD). The capture antibody was removed, plates were blocked with 1% BSA, and washed, and then plasma samples (diluted 1:20) and standards were added, followed by a 1-h incubation at 37 °C. Plates were then washed, and 2 µg/mL biotinylated anti-IgE detection antibody (clone R35-118; BD) was added. Binding was detected by subsequent incubation with streptavidin-conjugated alkaline phosphatase (Vector Laboratories), followed by the addition of phosphatase substrate tablets (Sigma) in phosphatase/glycine buffer. Plates were developed for 1 h at 37 °C, and optical densities at 405 nm were measured using a plate reader (Molecular Devices). IgE quantification was calculated according to calibration curves based on the optical densities for a series of dilutions of a control IgE isotype antibody of known concentration (clone C38-2; BD).

**Flow Cytometry.** For carboxyfluorescein diacetate succinimidyl ester (CFSE), cells were suspended at 10<sup>6</sup> per milliliter in PBS containing 10% FCS. An equal volume of 2 µM CFSE in PBS solution was then added with mixing (final concentration, 1 µM), and cells were incubated in a 37 °C water bath for 5–10 min and washed with cold complete RPMI (cRPMI) before use.

For cell trace violet (CTV) labeling before adoptive transfer of T cells, splenocytes suspended at 10<sup>8</sup> cells per milliliter in RPMI containing HI-FCS (10% vol/vol) were transferred to the base of a fresh 15mL conical tube; 1 µL of CTV stock solution (10 mM) per milliliter of cell suspension was placed on the dry wall of the tubes, and then tubes were capped, inverted, and briefly vortexed (final CTV concentration, 10 µM). After 5 min of incubation in the dark, 10 mL of 10% FCS/RPMI was added, and then cells were sedimented by centrifugation before another wash in 10 mL of the same medium. Cells were then resuspended in PBS and passed through a 70-µm cell strainer (BD) before i.v. injection (200 µL per mouse).

Lymphocytes from spleen were plated at 5 × 10<sup>5</sup> to 4 × 10<sup>6</sup> (a fixed value within this range for any given experiment). For cytokine staining, cells were plated at 10<sup>5</sup> per well in 96-well tissue culture plates in 200 µL of cRPMI containing phorbol myristate acetate (PMA) (50 ng/mL; Sigma), ionomycin (500 ng/mL; Sigma), and GolgiStop (1/1,000; BD) and left to accumulate cytokines for 3–4 h at 37 °C. Cells were surface-stained for 20 min at 4 °C with antibodies diluted in PBS containing 0.5% FCS (Gibco) and 2 mM EDTA. Where required, cells were then washed and resuspended in a secondary antibody for 20 min at 4 °C. For intracellular staining, cells were then fixed and permeabilized using the Fixation/Permeabilization kit (eBioscience) and stained for 20 min with intracellular antibodies and, where necessary, BrilliantViolet605-Streptavidin (BioLegend). After staining, cells were washed twice and read on an LSR II flow cytometer (BD). Flowjo software (Treestar) was used for analysis.

### Antibodies Used for Surface Staining.

| Antigen | Clone   | Conjugate       | Source        |
|---------|---------|-----------------|---------------|
| B220    | RA3-6B2 | PE-Cy7          | BD            |
| B220    | RA3-6B2 | APC-Cy7         | BioLegend     |
| CD4     | RM4-5   | Alexa Fluor 700 | BioLegend     |
|         | GK1.5   | APC-Cy7         | BD            |
|         | GK1.5   | Biotin          | BD            |
| CD8     | 53-6.7  | APC-Cy7         | BioLegend     |
| CD44    | IM7     | Pacific blue    | BioLegend     |
| CD45.1  | A20     | PE              | BD            |
| CD45.1  | A20     | Alexa Fluor 700 | BioLegend     |
| CD45.2  | 104     | PerCP-Cy5.5     | BD            |
| GITR    | DTA-1   | Biotin          | BioLegend     |
| CD25    | PC61.5  | PE              | eBioscience   |
|         | PC61    | APC             | BD            |
| TCRβ    | H57-597 | Biotin          | BD            |
| CD11b   | M1/70   | Biotin          | BD            |
| CD86    | GL1     | PE              | BD Pharmingen |
| CD23    | B3B4    | PE-Cy7          | eBioscience   |

### Antibodies Used for Intracellular Staining.

| Antigen | Clone        | Conjugate                | Source         |
|---------|--------------|--------------------------|----------------|
| Foxp3   | FJK-16s      | A700, FITC or eFluor 450 | eBioscience    |
| GATA-3  | L50-823      | Alexa Fluor 488          | BD             |
| IFN-γ   | XMG1.2       | APC                      | eBioscience    |
| IL-17A  | TC11-18H10.1 | FITC                     | BioLegend      |
| IL-4    | BVD6-24G2    | PE-Cy7                   | eBioscience    |
| JunB    | C37F9        | none                     | Cell Signaling |
| Ki-67   | B56          | Alexa Fluor 647          | BD             |







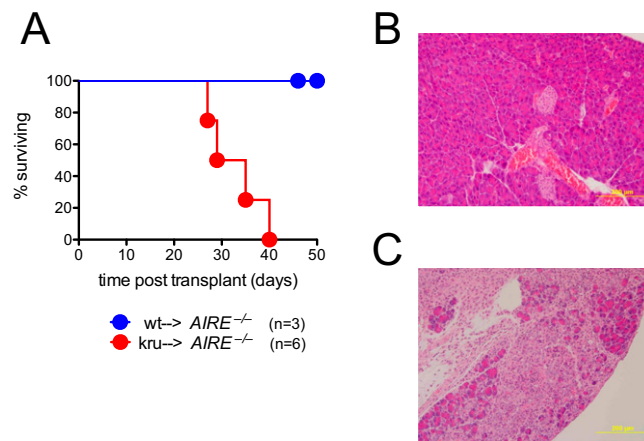

**Fig. 54.** *Ndfip1* deficiency cooperates with *Aire* deficiency to precipitate autoimmune pancreatitis. B10.BR *Aire*<sup>-/-</sup> mice were irradiated and transplanted with either *Ndfip1*<sup>kru/kru</sup> or wild-type B10.BR bone marrow. (A) Survival of recipients posttransplantation. (B and C) Representative histology of the pancreas in recipients of wild-type (B) or *Ndfip1*<sup>kru/kru</sup> (C) bone marrow.
